# Supplementary material
Source: publisher site journal article supplement (https://mycokeys.pensoft.net/article/31799/download/suppl/32/)
Supplement: Supplementary file 1

## Sheet: Isolates
Species	Notes	Isolated from	Country	LSU	RPB2	ITS
"Devriesia" americana	CBS 117726ET	Air sample	USA	EU040227	–	–
"Devriesia" compacta	CBS 118294 = TRN111ET	Rock sample	Spain	GU323967	KF310095	–
"Devriesia" pseudoamericana	CPC 16174T	Malus domestica	Germany	GU570544	–	GU570527
Acidiella bohemica	CBS 132720	Highly acidic soil	Czech Republic	KF901984	KF902178	–
Aeminium ludgeri	Isolate E8	Limestone sample	Portugal	MG938284	MG948613	MG938056
Aeminium ludgeri	Isolate E11	Limestone sample	Portugal	MG938285	MG948614	MG938057
Aeminium ludgeri	Isolate E12	Limestone sample	Portugal	MG938286	MG948615	MG938054
Aeminium ludgeri	Isolate E13	Limestone sample	Portugal	MG938287	MG948616	MG938061
Aeminium ludgeri	Isolate E14=DSM 106916T	Limestone sample	Portugal	MG938288	MG948617	MG938062
Aeminium ludgeri	Isolate E15	Limestone sample	Portugal	MG938289	MG948618	MG938063
Aeminium ludgeri	Isolate E16	Limestone sample	Portugal	MG938290	MG948619	MG938055
Aeminium ludgeri	Isolate E17	Limestone sample	Portugal	MG938291	MG948620	MG938058
Aeminium ludgeri	Isolate E18	Limestone sample	Portugal	MG938292	MG948621	MG938059
Aeminium ludgeri	Isolate E19	Limestone sample	Portugal	MG938293	MG948622	MG938060
Amycosphaerella africana	CBS 110500ET	Eucalyptus globulus	Australia	KF901837	KF902223	KF901516
Batcheloromyces leucadendri	CBS 111577 = CPC 1838EET	Leucadendron laureolum	South Africa	KF937221	KF937253	–
Batcheloromyces proteae	CBS 110696 = CPC 1518 = CPC 18701	Protea cynaroides	South Africa	KF901833	KF902195	–
Batcheloromyces sedgefieldii	CBS 110696 = CPC 1518 = CPC 18701	Protea cynaroides	South Africa	KF937222	KF937254	–
Capnodium coffeae	CBS 147.52	Coffea robusta	Zaire	KF902173	KF902196	–
Castanedospora pachyanthicola	CBS 140347T	–	USA	MH036005	–	MH036004
Castanedospora pachyanthicola	HKUCC 10835	–	P.R. China	DQ408557	–	–
Catenulostroma hermanusense	CBS 128768 = CPC 18276ET	Phaenocoma prolifera	South Africa	KF902089	KF902197	–
Catenulostroma protearum	CBS 314.95ET	Smilax sp. leaf	Cuba	KF902090	KF902198	–
Cercospora capsici	CBS 118712	–	Fiji	KF251800	KF252302	–
Chaetothyrina guttulata	MFLUCC15-1080	–	Thailand	KU358917	–	KX372277
Chaetothyrina musarum	MFLUCC15-0383	–	Thailand	KU710171	–	KX372275
Cladosporium allicinum	CBS 188.53 = IFO 5267	–	Japan	MF951115	MF951411	KT600367
Cladosporium fusiforme	CBS 119414T	Hypersaline water	Slovenia	KJ564333	–	DQ780388
Cladosporium iridis	CBS 138.40ET	Iris sp.	The Netherlands	EU167591	KT223022	EF679370
Cladosporium ramotenellum	CBS 133.29 = ATCC 36970	Populus tremuloides	–	MF951116	MF951413	MF951281
Constantinomyces macerans	TRN440	Rock sample	Spain	KF310005	KF310081	–
Cystocoleus ebeneus	L348	Rock sample	Austria	EU048580	–	–
Dissoconium aciculare	CBS 342.82	–	Germany	EU019266	–	AF173308
Dothistroma pini	CBS 116483	Pinus nigra	USA	JX901825	JX901949	–
Elasticomyces elasticus	CCFEE 5506	Rock sample	Argentina	KF309997	KF310048	–
Exopassalora zambiae	CBS 112971T = CMW 14782 = CPC 1227	Eucalyptus globulus	Zambia	EU019273	MF951421	AY725523
Extremus adstrictus	CBS 118292 = TRN96ET	Rock sample	Spain	KF310022	KF310103	AY559346
Extremus antarcticus	CCFEE 5312	Rock sample	Antarctica	KF310020	KF310086	KF309979
Extremus antarcticus	CBS 136103 T=CCFEE 451	Sandstone sample	Antarctica	GU250360	KF310085	KF309978
Friedmanniomyces endolithicus	CCFEE 5283	Rock sample	Antarctica	KF310006	KF310053	–
Hortaea thailandica	CBS 125423 = CPC 16651ET	Syzygium siamense	Thailand	KF902125	KF902206	GU214637
Hortaea werneckii	CBS 107.67	–	Portugal	EU019270	–	AJ238468
Meristemomyces frigidus	CEIFE 5507	Rock sample	Argentina	KF310013	KF310066	–
Microxyphium citri	CBS 451.66	Citrus sinensis	Spain	KF902094	KF902209	–
Mycosphaerella sumatrensis	CBS 118502	Eucalyptus sp.	Indonesia	KF901996	KF902222	JX901775
Neodevriesia agapanthi	CBS 132689 = CPC 19833ET	Agapanthus africanus	South Africa	JX069859	KJ564346	–
Neodevriesia bulbillosa	CBS 118285 = TRN81	Rock sample	Spain	KF310029	KF310102	AY559341
Neodevriesia bulbillosa	TRN152	Limestone sample	Spain	GU323976	–	AY559377
Neodevriesia capensis	CBS 130602 = CPC 18299 ET	Protea sp.	South Africa	JN712569	–	JN712501
Neodevriesia cladophorae	OUCMBI110 119 T	Cladophora sp.	China	KU578114	KY415955	KU578112
Neodevriesia cladophorae	OUCMBI101 247	Ahnfeltiopsis sp.	China	KU578117	KY415956	KU578115
Neodevriesia coryneliae	CPC 23534 ET	Corynelia uberata	South Africa	KJ869211	–	NR_132905
Neodevriesia fici	LWHHK-7 T	Ficus elastica	China	–	–	JX294932
Neodevriesia fraserae	CBS 128217 T	Melaleuca sp.	Australia	–	–	NR_144961
Neodevriesia grateloupiae	OUCMBI101 249 T	Grateloupia sp	China	KU578120	KY415957	KU578118
Neodevriesia grateloupiae	OUCMBI141 254	Blidingia sp.	China	KX237688	KY415958	KX237686
Neodevriesia imbrexigena	CAP1371T	Glazed decorative tiles in association with Trebouxia sp.	Portugal	JX915749	–	JX915745
Neodevriesia imbrexigena	CAP1373	Glazed decorative tiles in association with Trebouxia sp.	Portugal	JX915750	–	JX915746
Neodevriesia knoxdaviesii	CBS 122898 = CPC 14960 ET	Protea sp.	South Africa	EU707865	–	EU707865
Neodevriesia lagerstroemiae	CBS 125422 = CPC 14403ET	Lagerstroemia indica	USA	KF902149	KF902233	–
Neodevriesia modesta	CBS 137182 = CCFEE 5672ET	Rock sample	Italy	KF310026	KF310093	NR_144975
Neodevriesia pakbiae	CPC25044T	Unidentified fern	Thailand	KR476775	–	NR_137997
Neodevriesia poagena	CBS 140007 = CPC 25086ET	Stems of Poa sp.	Netherlands	KR611903	–	KR611885
Neodevriesia queenslandica	CBS 129527 = CPC 17306ET	Scaevola taccada	Australia	KF901839	KF902234	JF951148
Neodevriesia shakazului	CBS 133579 = CPC 19784ET	Aloe sp.	South Africa	KC005797	–	KC005776
Neodevriesia simplex	CBS 137183 = CCFEE 5681ET	Rock sample	Italy	KF310027	KF310104	KF309985
Neodevriesia stirlingiae	CBS 133581 = CPC 19948ET	Stirlingia latifolia	Australia	KC005799	–	KC005778
Neodevriesia strelitziae	CBS 122379 = X1037ET	Strelitzia nicolai	South Africa	GU301810	–	EU436763
Neodevriesia xanthorrhoeae	CBS 128219 T=CPC 17720	Leaves of Xanthorrhoea australis	Australia	HQ599606	–	HQ599605
Neodevriesiaceae sp.	CBS 118302	Rock sample	Spain	GU323975	KF310100	–
Neodevriesiaceae sp.	CPC 19594	Mycoparasite of Myriangium sp.	Brazil	KJ564327	KJ564349	–
Neohortaea acidophila	CBS 113389	–	Germany	GU323202	–	GU214636
Pallidocercospora heimii	CPC 11441	Eucalyptus sp.	Brazil	KF901935	KF902245	KF901610
Paramycosphaerella intermedia	CBS 114356 = CPC 10902 = NZFS 301 K/1	Eucalyptus saligna	New Zealand	KF902026	KF902255	KF901681
Paramycosphaerella marksii	CBS 110750 = CPC 822 = CMW 14778	Eucalyptus grandis	South Africa	KF902056	KF902262	KF901709
Parateratosphaeria altensteinii	CBS 123539 = CPC 15133ET	Encephalartos altensteinii	South Africa	KF937230	KF937267	–
Parateratosphaeria bellula	CBS 111700 = CPC 1821EET	Protea eximia	South Africa	KF937232	–	–
Parateratosphaeria karinae	CBS 128774 = CPC 18255ET	Phaenocoma prolifera	South Africa	KF902091	KF902266	–
Petrophila incerta	CBS 118608 = TRN139bET	Rock sample	Spain	KF310030	KF310091	AY559372
Petrophila incerta	CBS 118287=TRN77	Limestone sample	Spain	GU323963	KF310101	AY559337
Petrophila incerta	CBS 118305=TRN62	Limestone sample	Spain	GU323961	KF310084	AY559328
Phaeothecoidea intermedia	CBS 124994 = CPC 13711ET	Eucalyptus globulus	Australia	KF902106	KF902286	KF901752
Phaeothecoidea minutispora	CBS 124995 = CPC 13710ET	Eucalyptus globulus	Australia	KF902107	KF902287	–
Polychaeton citri	CBS 116435	Citrus aurantium	Iran	GU214469	–	–
Pseudocercospora schizolobii	CBS 120029 = CPC 12962ET	Schizolobium parahybum	Ecuador	KF251826	KF252326	–
Pseudoramichloridium brasilianum	CBS 283.92ET	Forrest soil	Brazil	EU041854	–	EU041797
Pseudoramichloridium henryi	CBS 124775 = CPC 13121ET	Corymbia henryi	Australia	KF901857	KF902344	KF901535
Pseudoteratosphaeria flexuosa	CBS 111012 = CPC 1109ET	Eucalyptus globulus	Colombia	KF902110	KF902346	KF901755
Pseudoteratosphaeria gamsii	CBS 118495 = CPC 11138ET	Eucalyptus sp.	India	KF901990	KF902347	KF901650
Pseudoteratosphaeria secundaria	CBS 118507 = CPC 11551ET	Eucalyptus sp.	Brazil	KF901947	KF902354	KF901621
Ramichloridium apiculatum	CBS 400.76	Soil sample	Pakistan	EU041851	KJ564337	–
Ramularia endophylla	CBS 113265ET	Dead leaf of Quercus robur	Netherlands	KF902072	KF902358	KF901725
Readeriella nontingens	CPC 14444	Eucalyptus oblonga	Australia	KF902073	KF902378	KF901726
Recurvomyces mirabilis	CBS 119434 = CCFEE 5264ET	Sandstone sample	Antarctica	GU250372	KF310059	–
Repetophragma zygopetali	VIC 42946	–	Brazil	KT732418	–	KU609074
Saxophila tyrrhenica	TRN66	Limestone sample	Spain	GU323962	–	AY559330
Saxophila tyrrhenica	CBS 139725 =CCFEE 5935T	Marble sample	Italy	KR781051	–	KP791764
Schizothyrium pomi	CBS 486.50	Polygonum sachalinense	The Netherlands	KF902024	KF902385	–
Schizothyrium pomi	CBS 228.57	–	Italy	KF902007	KF902384	–
septoria-like sp.	CBS 134910 = CPC 19500	Tibouchina herbacea	Brazil	KF302409	KF302397	–
Sonderhenia eucalypticola	CPC 11251	Eucalyptus globulus	Spain	KF902099	KF902387	KF901746
Staninwardia suttonii	CBS 120061 = CPC 13055ET	Eucalyptus robusta	Australia	KF901874	KF902392	KF901552
Stomiopeltis versicolor	GA3 23C2b	–	USA	FJ147163	–	FJ438375
Teratosphaeria cryptica	CBS 110975 = CMW 3279 = CPC 936	Eucalyptus globulus	Australia	KF901897	KF902425	KF901573
Teratosphaeria fibrillosa	CBS 121707 = CPC 13960ET	Protea sp.	South Africa	KF902075	–	KF901728
Teratosphaeria nubilosa	CBS 116005 = CMW 3282 = CPC 937	Eucalyptus globulus	Australia	KF902031	KF902460	KF901686
Teratosphaeria stellenboschiana	CBS 125215 = CPC 13764	Eucalyptus punctata	South Africa	KF937247	KF937282	–
Toxicladosporium protearum	CBS 126499 = CPC 15254ET	Protea burchellii	South Africa	HQ599587	KJ564344	–
Toxicocladosporium irritans	CBS 128777 = CPC 18471ET	Phaenocoma prolifera	South Africa	JF499868	KJ564345	–
Toxicocladosporium rubrigenum	CBS 124158 = CPC 15735ET	Eucalyptus camaldulensis	Madagascar	FJ790305	KJ564338	–
Tripospermum myrti	CBS 437.68	Citrus sp.	Java	GU323216	KF902502	–
Uwebraunia australiensis	CBS 120729 = CPC 13282ET	Eucalyptus platyphylla	Australia	GQ852588	KJ564339	–
Uwebraunia commune	CBS 110809 = CPC 830ET	Eucalyptus nitens	South Africa	KJ564336	KJ564351	–
Uwebraunia dekkeri	CPC 13264	Eucalyptus molucana	Australia	GQ852593	KJ564340	–
Vermiconia antarctica	CBS 136107 = CCFEE 5488ET	Rock sample	Antarctica	KJ564324	KF310089	KF309982
Vermiconia antarctica	CBS 136108=CCFEE 5489	Rock sample	Antarctica	KF310023	KF310090	KF309983
Vermiconia calcicola	CCFEE 5714	Marble sample	Italy	KR781047	KT247883	KP791760
Vermiconia calcicola	CCFEE 5898	Marble sample	Vatican City State	KR781044	KT247880	KP791757
Vermiconia calcicola	CCFEE 5905	Marble sample	Vatican City State	KR781043	KT247879	KP791756
Vermiconia flagrans	CBS 118296 = TRN114ET	Rock sample	Spain	KF310024	KF310096	–
Vermiconia flagrans	CCFEE 5922	Travertine sample	Vatican City State	KR781040	KT247876	KP791753
Vermiconia flagrans	CBS 118283=TRN124	Limestone sample	Spain	GU323971	KF310097	AY559359
Vermiconia foris	CBS 136106 T=CCFEE 5459	Punta Indren Monte Rosa	Italy	GU250390	KF310088	KF309981
Verrucocladosporium dirinae	CBS 112794T	On lichen Dirina massiliensis	UK	EU040244	–	EU040244
Zygophiala cryptogama	CBS 125658	–	USA	FJ147157	–	FJ425208
Zygophiala wisconsinensis	CBS 125659	–	USA	FJ147158	–	FJ425209
Zymoseptoria verkleyi	CBS 133618	Poa annua	The Netherlands	KC005802	KJ564348	–
Uncultured fungus clone B3-1139	–	Limestone sample	Spain	–	–	KU580848
Uncultured fungus clone B3-1746	–	Limestone sample	Spain	–	–	KU581454
Uncultured fungus clone B3-1855	–	Limestone sample	Spain	–	–	KU581562
Uncultured fungus clone B3-2523	–	Limestone sample	Spain	–	–	KU582224
Uncultured fungus clone B3-366	–	Limestone sample	Spain	–	–	KU580076
Uncultured fungus clone B3-764	–	Limestone sample	Spain	–	–	KU580474
*(T=Type; ET=Ex-Type; CBS Westerdijk Fungal Biodiversity Institute, Utrecht, The Netherlands; CPC Collection Pedro Crous, housed at CBS; CCFEE Culture Collection of Fungi from Extreme Environments, Dept. of Ecological and Biological Sciences, University of Tuscia, Viterbo, Italy; TRN T. Ruibal personal collection; GPC Mark Gleason’s personal collection, hosted at Iowa State University; IFO: Insti…
